# Supplementary material for: Non-uniformity of cell density and networks in the monkey brain
Source: PubMed Central journal article supplement — Sci Rep. 2013 Aug 29;3:2541. doi: 10.1038/srep02541 (PMC3756338; doi:10.1038/srep02541), 2013-08-29
Supplement: srep02541-s1.pdf [file srep02541-s1.pdf]

# **Non-uniformity of cell density and networks in the monkey brain**

Masanori Shimono<sup>1</sup>

1.Dept. of Physics, Indiana University, Swain Hall West, 727 E. 3rd St., Bloomington, IN, 47405-7105, U.S.A.

| Brain Regions in CoCoMac                      | Abbreviations | Indexes in Collins data | Module Indexes |
|-----------------------------------------------|---------------|-------------------------|----------------|
| Primary visual cortex                         | V1            | 6,9-13                  | 1              |
| Secondary visual cortex                       | V2            | 1,2,3                   | 1              |
| Third visual area                             | V3            | 5                       | 1              |
| Visual area V3a                               | V3a           | 8                       | 1              |
| Ventral Posterior Visual area                 | VP            | 16                      | 1              |
| Visual occipito-temporal area                 | VOT           | 20                      | 1              |
| Visual area 4                                 | V4            | 19                      | 1              |
| Transitional zone of V4 abutting MT           | V4t           | 20                      | 1              |
| Parieto-occipital visual area                 | PO            | 31                      | 1              |
| Posterior intraparietal area                  | PIP           | 31                      | 1              |
| Lateral intraparietal                         | LIP           | 32                      | 3              |
| Ventral intraparietal                         | VIP           | 32                      | 1              |
| Middle temporal area                          | MT            | 17                      | 1              |
| Medial superior temporal (dorsal)             | MSTd          | 28                      | 1              |
| Medial superior temporal (lateral)            | MSTl          | 28                      | 1              |
| Area 7a                                       | A7a           | 32                      | 3              |
| Area 7b                                       | A7b           | 32                      | 2              |
| Floor of superior temporal area               | FST           | 17                      | 1              |
| Posterior inferotemporal area, ventral        | PITv          | 21                      | 4              |
| Posterior inferotemporal area, dorsal         | PITd          | 18                      | 1              |
| TF of the parahippocampal cortex              | TF            | 21                      | 4              |
| Superior temporal polysensory area, anterior  | STPa          | 27                      | 4              |
| Superior temporal polysensory area, posterior | STPp          | 28                      | 3              |
| Central inferotemporal area, ventral          | CITv          | 21                      | 4              |
| Central inferotemporal area, dorsal           | CITd          | 18                      | 4              |
| Anterior inferotemporal area, ventral         | AITv          | 22                      | 4              |
| Anterior inferotemporal area, dorsal          | AITd          | 18                      | 4              |
| Dorsal prelunate                              | DP            | 32                      | 1              |
| Ventral temporal polar cortex                 | TGV           | 23                      | 4              |
| Dorsal temporal polar cortex                  | TGD           | 23                      | 4              |
| Superior temporal auditory area1              | TS1           | 23                      | 4              |
| Superior temporal auditory area2              | TS2           | 23                      | 4              |

|                                           |      |     |   |
|-------------------------------------------|------|-----|---|
| Area 35, Perirhinal cortex                | A35  | 23  | 4 |
| Entorhinal cortex                         | ER   | 23  | 4 |
| Superior temporal auditory area3          | TS3  | 28  | 5 |
| TH of the parahippocampal cortex          | TH   | 22  | 4 |
| Auditory parakoniocortical area (lateral) | PaAl | 25  | 5 |
| Auditory parakoniocortical area (caudal)  | PaAc | 25  | 5 |
| Auditory koniocortical area (primary)     | KA   | 24  | 5 |
| Auditory prokoniocortex                   | PROA | 24  | 5 |
| Auditory retroinsular temporal cortex     | Reit | 25  | 5 |
| Insula granular                           | Ig   | 35  | 2 |
| Insula dysgranular                        | Id   | 35  | 2 |
| Auditory area Tpt                         | TPT  | 28  | 5 |
| Retroinsular cortex                       | Ri   | 32  | 2 |
| Area 5 in Primary Sensory cortex          | A5   | 31  | 2 |
| Area 4, Primary motor cortex              | A4   | 30  | 2 |
| Area 3a in Primary Sensory cortex         | A3a  | 30  | 2 |
| Area 3b in Primary Sensory cortex         | A3b  | 29a | 2 |
| Area 2 in Primary Sensory cortex          | A2   | 29  | 2 |
| Area 1 in Primary Sensory cortex          | A1   | 29  | 2 |
| Secondary somatosensory area              | S2   | 35  | 2 |
| Area 6, Premotor cortex                   | A6   | 30  | 2 |
| Supplementary motor cortex                | SMA  | 34  | 2 |
| Gustatory cortex                          | G    | 35  | 2 |
| Area 11                                   | A11  | 26  | 3 |
| Area 13                                   | A13  | 26  | 4 |
| Area 23, Posterior cingulate              | A23  | 39  | 3 |
| Area 24, Anterior cingulate               | A24  | 39  | 3 |
| Area 45                                   | A45  | 41  | 3 |
| Frontal eye field, area 8                 | FEF  | 40  | 3 |
| Area 25                                   | A25  | 41  | 4 |
| Area 12                                   | A12  | 41  | 4 |
| Area 14                                   | A14  | 41  | 2 |
| Area 46                                   | A46  | 40  | 3 |

|         |     |    |   |
|---------|-----|----|---|
| Area 32 | A32 | 41 | 3 |
| Area 9  | A9  | 37 | 3 |
| Area 10 | A10 | 41 | 3 |

**Table S-1. Summary of the labels of the different brain regions.** The first row is the list of names of the brain regions used in the CoCoMac database. The second row lists their abbreviated names. The third row is a list of the names of the brain regions used in the Collin's data set, and the fourth row lists labels of the communities detected using the community detection method.

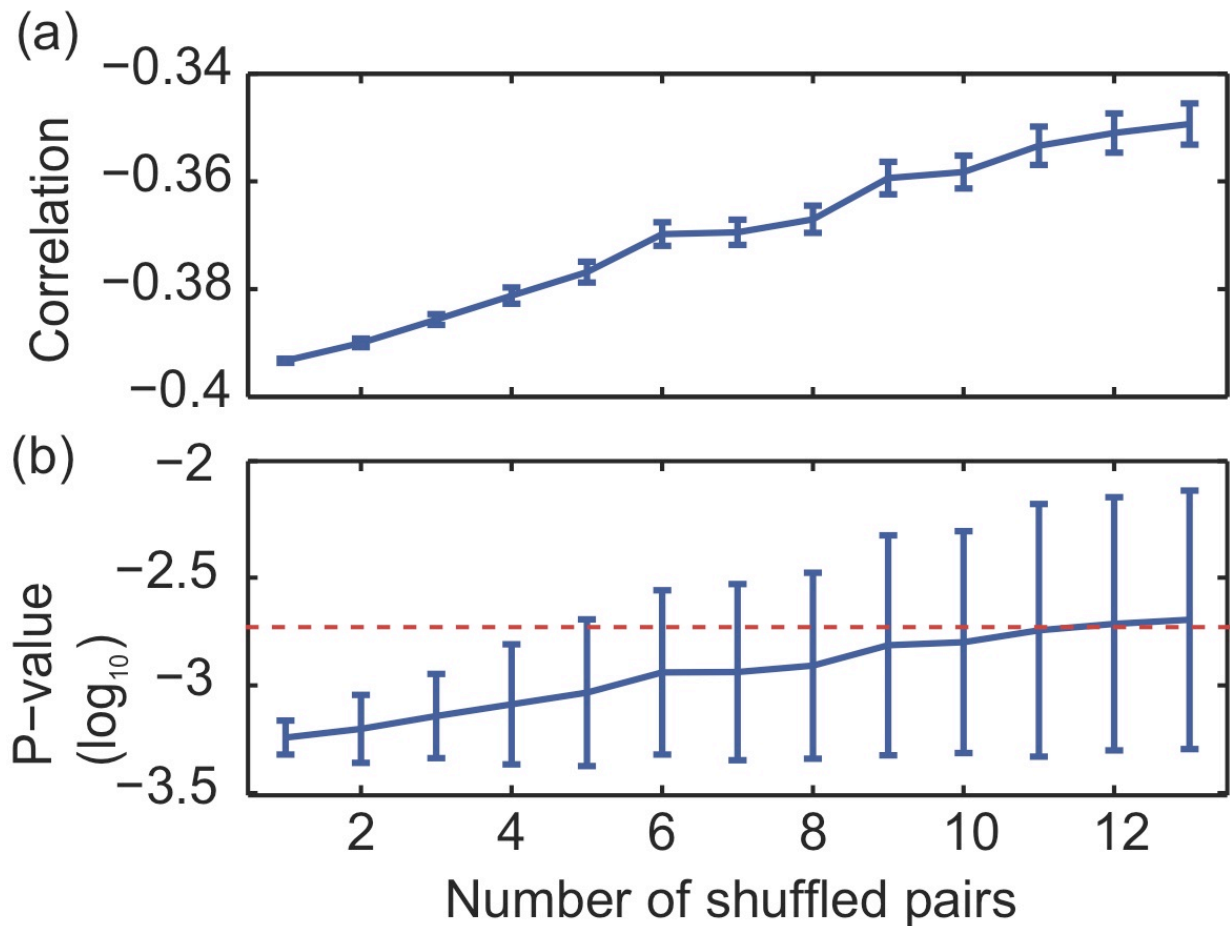

**S-2. The reduction of correlation after exchanging nodes.** (a) The change of correlations between the neuron-per-nonneuron ratio and participation coefficients depending on the number of pairs of exchanged adjacent brain regions. (b) The decrease of p-value according to the change of correlation value. The average p-value passed over the significance level (red dotted line) when the exchanged number is six. The error bars are deviations from their means.

## Development of community structure in the optimization process

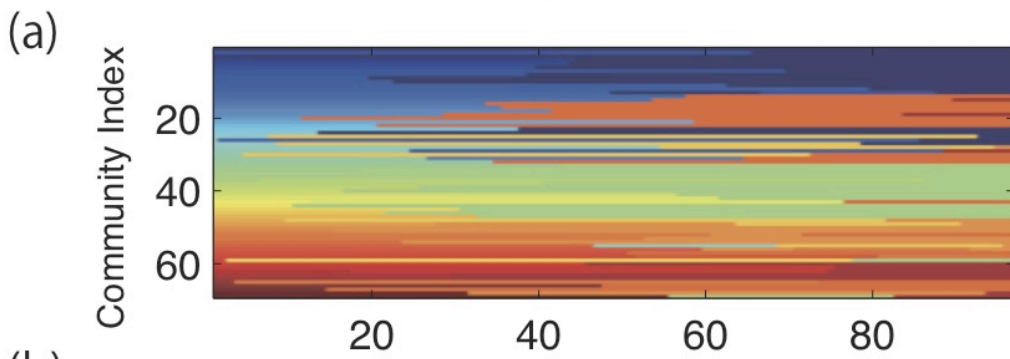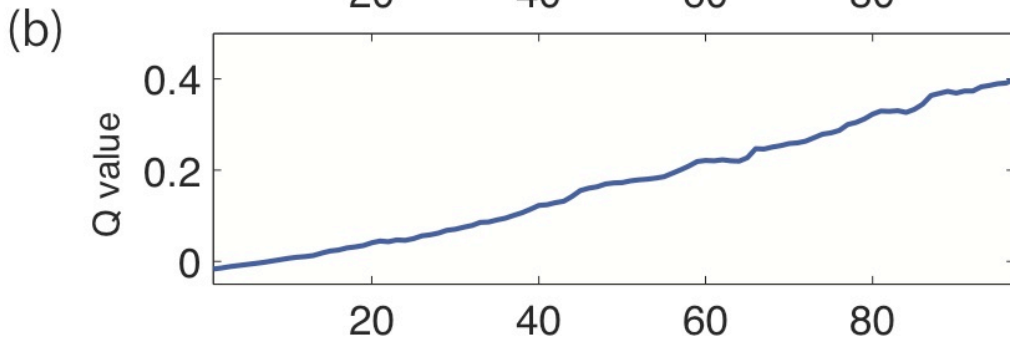

## Correlation between neuron per glia ratio and Participation Coefficient

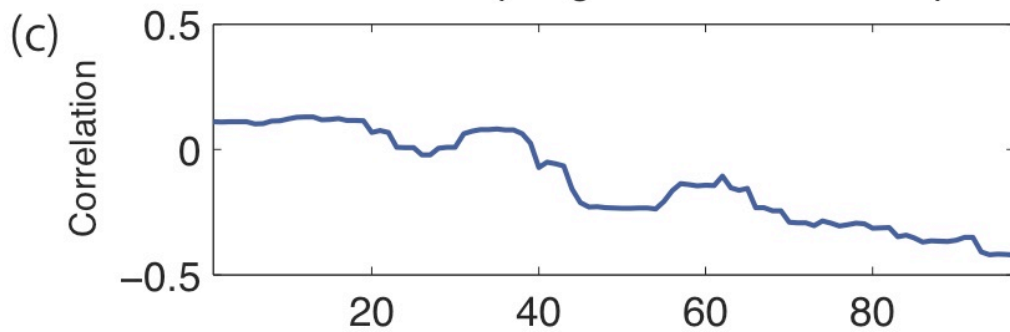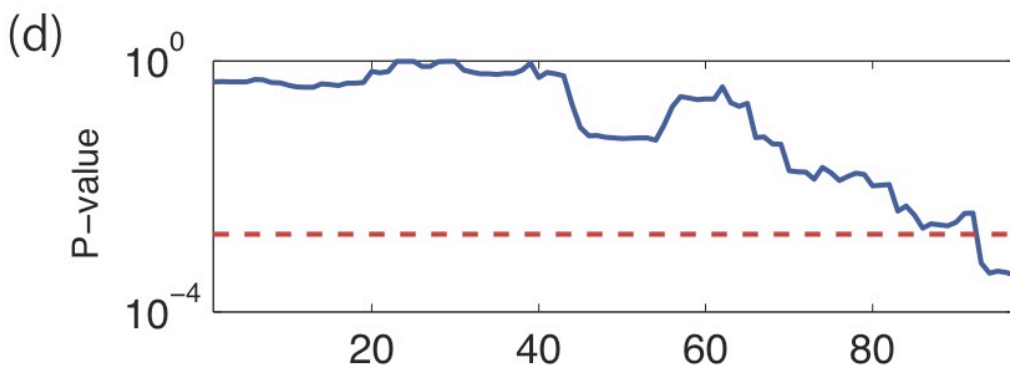

Optimization steps

**S-3. The development of a community structure.** (a) The development of the segmentation between communities. The Louvain method starts from the initial condition that all nodes are separated and gradually connect between two small communities to achieve the maximum increase of the Q value. The x-axis is the calculation step, and the y-axis is the index of nodes. The color map shows

the community indices of the individual nodes. (b) The increase in Q value was dependent on the calculation steps. (c) The change in correlation between the neuron-per-nonneuron ratio and participation coefficient during the progression of the calculation step. (d) The p value also decreased according to the change in correlation. These values were significant (lower than the red line).
